# Supplementary material for: Synergistic effect of porous carbon shell confinement and catalytic conversion of nickel nanoparticle cores for improved lithium–sulfur batteries
Source: Royal Society of Chemistry journal article supplement (doi:10.1039/d3ra01339a), 2023-01-01
Supplement: d3ra01339a1.pdf [file d3ra01339a1.pdf]

## Supplementary Information

### **Synergistic effect of porous carbon shell confinement and catalytic conversion of nickel nanoparticles core for improved lithium-sulfur batteries**

Liu Jianming<sup>1</sup>, Zhang Jin<sup>1\*</sup>, Jiang Shang<sup>1</sup>, Zhao Jianguo<sup>1, 2\*</sup>

1. Engineering Research Center of Coal-based Ecological Carbon Sequestration Technology  
of the Ministry of Education, Shanxi Datong University, Datong, 037009 China

2. Research Institute of Shaoxing, Shanghai University, Shaoxing, 312000 China

\*Corresponding authors.

E-mail addresses: [jgzaoshi@163.com](mailto:jgzaoshi@163.com) (Zhao Jianguo), [zhangjing8014484@163.com](mailto:zhangjing8014484@163.com)  
(Zhang Jin)

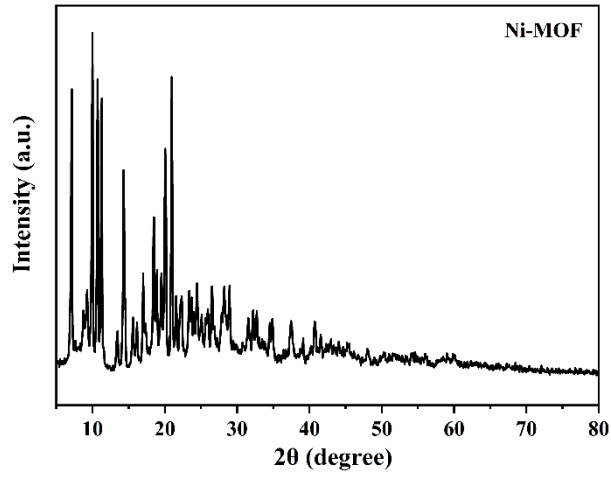

Figure S1. XRD pattern of Ni-MOF.

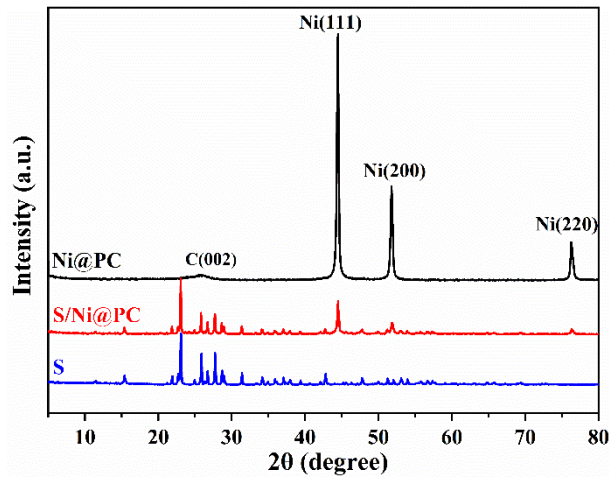

Figure S2. XRD patterns of Ni@PC, S/Ni@PC and S.

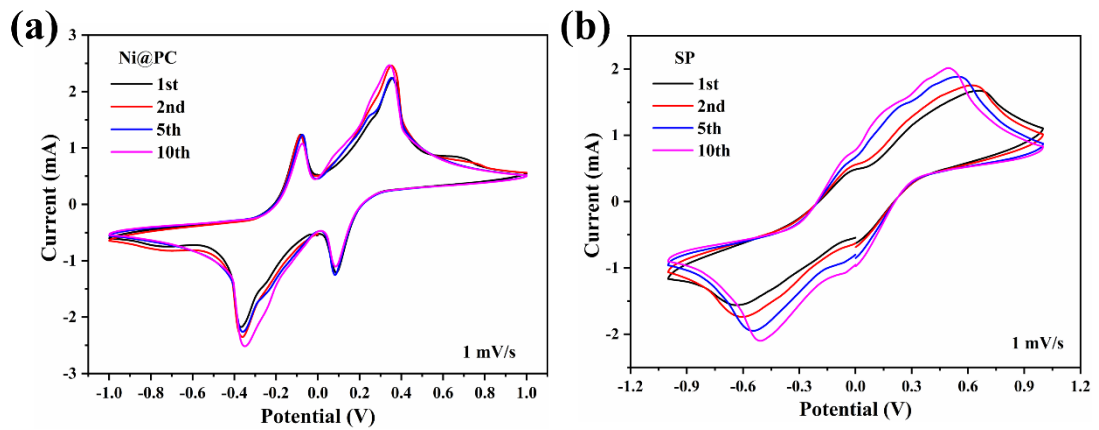

Figure S3. CV curves of Ni@PC (a) and SP (b) symmetric cell with 0.2 M  $\text{Li}_2\text{S}_6$  electrolytes at  $1 \text{ mV}\cdot\text{s}^{-1}$ .

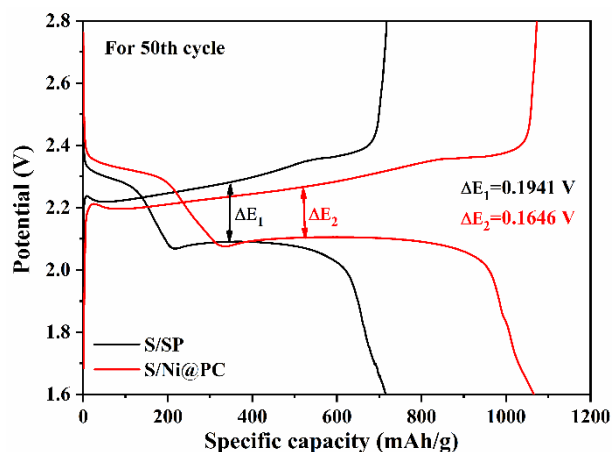

**Figure S4.** Galvanostatic charge/discharge curves of S/Ni@PC and S/SP for the 50<sup>th</sup> cycle at 0.2C.

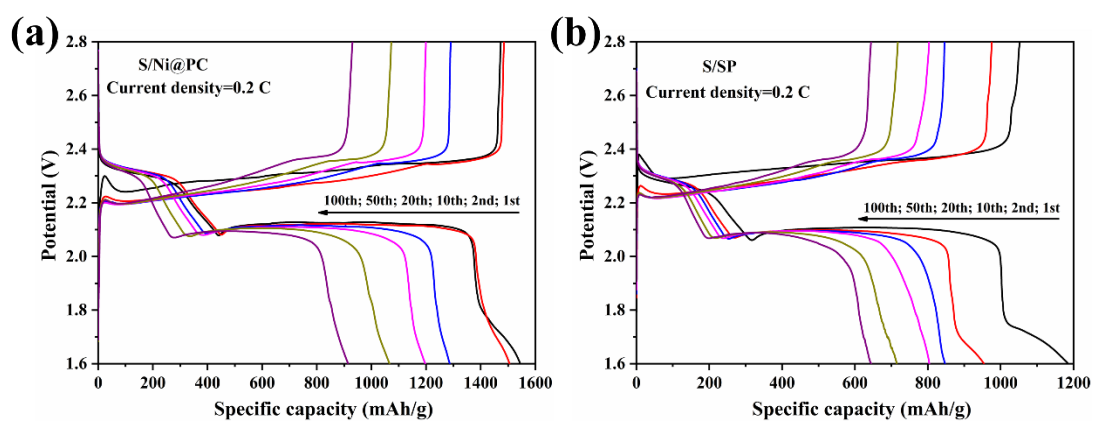

**Figure S5.** Galvanostatic charge/discharge curves of S/Ni@PC (a) and S/SP (b) at 0.2C.

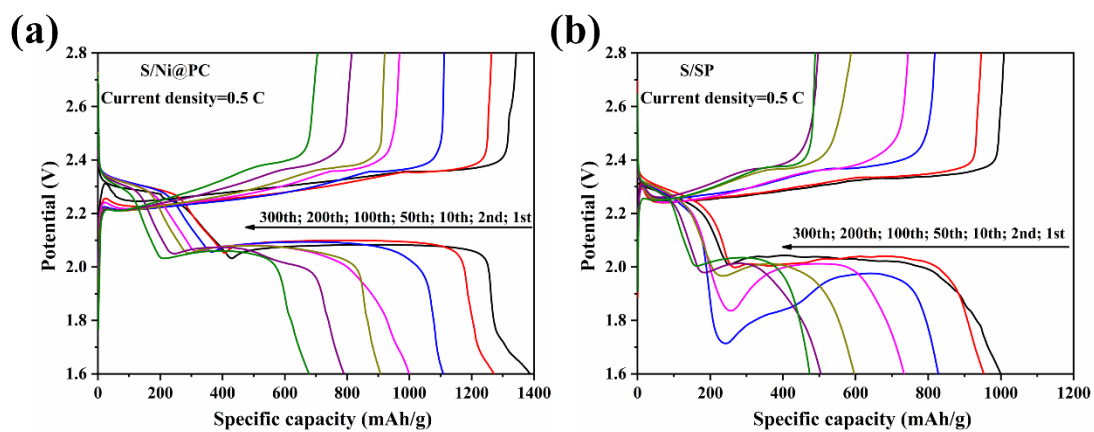

**Figure S6.** Galvanostatic charge/discharge curves of S/Ni@PC (a) and S/SP (b) at 0.5C.

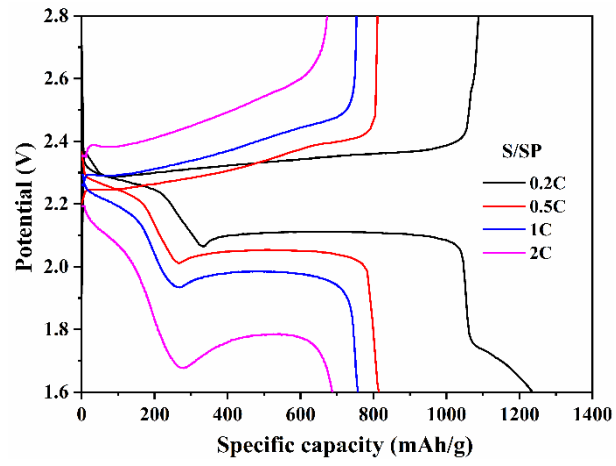

**Figure S7.** Galvanostatic charge/discharge curves of S/SP at 0.2~2C.
